# Supplementary material for: The use of an in vitro fecal fermentation model to uncover the beneficial role of omega-3 and punicic acid in gut microbiota alterations induced by a Western diet
Source: Royal Society of Chemistry journal article supplement (doi:10.1039/d4fo00727a), 2024-01-01
Supplement: d4fo00727a1.pdf [file d4fo00727a1.pdf]

## Supplementary material

**Table 1** Major FAs concentration ( $\mu\text{g}$  of fatty acid / $\mu\text{L}$  of the sample) of the different samples at the different fermentation times (0, 6, 12, 24, and 48 h). CD-Control Diet and WD-Western Diet models. The values presented are the means of three biological and two analytical replicates the bars represent the standard deviation. Different lowercase letters indicate significant differences ( $p < 0.05$ ) between the CD samples and capital letters indicate significant differences ( $p < 0.05$ ) between the WD samples. CD= Control diet; WD= Western diet; n.d.= not detected; u.q.l= under quantification limit

| $\mu\text{g}$ of FA/ $\mu\text{L}$ of the sample |                | Fish oil+Pomegranate oil       |                               |                               |                              |                               |                               |                              |                              | Pomegranate oil              |                                 |                                |                               |                               |                               |                               |                                | Fish oil                      |                                |                                |                              |                               |                               |                               |                               |                               |                               |                              |      |
|--------------------------------------------------|----------------|--------------------------------|-------------------------------|-------------------------------|------------------------------|-------------------------------|-------------------------------|------------------------------|------------------------------|------------------------------|---------------------------------|--------------------------------|-------------------------------|-------------------------------|-------------------------------|-------------------------------|--------------------------------|-------------------------------|--------------------------------|--------------------------------|------------------------------|-------------------------------|-------------------------------|-------------------------------|-------------------------------|-------------------------------|-------------------------------|------------------------------|------|
|                                                  |                | Original sample                | Control Diet                  |                               |                              |                               | Western Diet                  |                              |                              |                              | Original sample                 | Control Diet                   |                               |                               |                               | Western Diet                  |                                |                               |                                | Original sample                | Control Diet                 |                               |                               |                               | Western Diet                  |                               |                               |                              |      |
|                                                  |                |                                | 6h                            | 12h                           | 24h                          | 48h                           | 6h                            | 12h                          | 24h                          | 48h                          |                                 | 6h                             | 12h                           | 24h                           | 48h                           | 6h                            | 12h                            | 24h                           | 48h                            |                                | 6h                           | 12h                           | 24h                           | 48h                           | 6h                            | 12h                           | 24h                           | 48h                          |      |
| Myristic acid                                    | C14:0          | 1.67 $\pm$ 0.62 <sup>AA</sup>  | 1.71 $\pm$ 0.14 <sup>a</sup>  | 1.65 $\pm$ 0.12 <sup>a</sup>  | 1.32 $\pm$ 0.2 <sup>a</sup>  | 1.54 $\pm$ 0.1 <sup>3a</sup>  | 1.44 $\pm$ 0.06 <sup>A</sup>  | 1.55 $\pm$ 0.05 <sup>A</sup> | 1.54 $\pm$ 0.11 <sup>A</sup> | 1.43 $\pm$ 0.05 <sup>A</sup> | n.d.                            | n.d.                           | n.d.                          | n.d.                          | n.d.                          | n.d.                          | n.d.                           | n.d.                          | 11.36 $\pm$ 3.52 <sup>AA</sup> | 7.11 $\pm$ 0.39 <sup>b</sup>   | 7.03 $\pm$ 0.27 <sup>b</sup> | 5.95 $\pm$ 0.41 <sup>b</sup>  | 6.29 $\pm$ 0.32 <sup>b</sup>  | 4.94 $\pm$ 0.28 <sup>B</sup>  | 6.53 $\pm$ 0.23 <sup>B</sup>  | 6.87 $\pm$ 0.38 <sup>B</sup>  | 6.02 $\pm$ 0.44 <sup>B</sup>  |                              |      |
| Palmitic acid                                    | C16:0          | 4.38 $\pm$ 1.42 <sup>AA</sup>  | 3.5 $\pm$ 0.17 <sup>b</sup>   | 3.43 $\pm$ 0.41 <sup>b</sup>  | 2.62 $\pm$ 0.5 <sup>1b</sup> | 3.16 $\pm$ 0.3 <sup>1b</sup>  | 2.92 $\pm$ 0.2 <sup>A</sup>   | 3.25 $\pm$ 0.28 <sup>A</sup> | 3.33 $\pm$ 0.32 <sup>A</sup> | 2.91 $\pm$ 0.53 <sup>A</sup> | 4.9 $\pm$ 0.3 <sup>4A</sup>     | 2.31 $\pm$ 0.26 <sup>b</sup>   | 2.87 $\pm$ 0.37 <sup>b</sup>  | 2.14 $\pm$ 0.40 <sup>b</sup>  | 2.68 $\pm$ 0.57 <sup>b</sup>  | 2.42 $\pm$ 0.07 <sup>B</sup>  | 2.53 $\pm$ 0.07 <sup>B</sup>   | 2.43 $\pm$ 0.07 <sup>B</sup>  | 2.35 $\pm$ 0.31 <sup>B</sup>   | 23.17 $\pm$ 4.61 <sup>AA</sup> | 13.5 $\pm$ 0.86 <sup>b</sup> | 13.61 $\pm$ 0.46 <sup>b</sup> | 11.48 $\pm$ 1.11 <sup>b</sup> | 12.41 $\pm$ 0.70 <sup>b</sup> | 11.34 $\pm$ 0.66 <sup>B</sup> | 12.64 $\pm$ 0.47 <sup>B</sup> | 14.45 $\pm$ 0.75 <sup>B</sup> | 11.6 $\pm$ 0.39 <sup>B</sup> |      |
| Stearic acid                                     | C18:0          | 1.22 $\pm$ 0.35 <sup>AA</sup>  | 1.45 $\pm$ 0.01 <sup>a</sup>  | 1.41 $\pm$ 0.07 <sup>a</sup>  | 1.18 $\pm$ 0.1 <sup>2a</sup> | 1.28 $\pm$ 0.0 <sup>7a</sup>  | 1.33 $\pm$ 0.12 <sup>A</sup>  | 1.42 $\pm$ 0.12 <sup>A</sup> | 1.33 $\pm$ 0.10 <sup>A</sup> | 1.3 $\pm$ 0.07 <sup>A</sup>  | 3.38 $\pm$ 0.15 <sup>AA</sup>   | 2.35 $\pm$ 0.14 <sup>b</sup>   | 2.5 $\pm$ 0.11 <sup>b</sup>   | 2.11 $\pm$ 0.17 <sup>b</sup>  | 2.43 $\pm$ 0.58 <sup>b</sup>  | 2.25 $\pm$ 0.05 <sup>BC</sup> | 2.4 $\pm$ 0.04 <sup>B</sup>    | 2.18 $\pm$ 0.02 <sup>C</sup>  | 2.21 $\pm$ 0.04 <sup>C</sup>   | 3.93 $\pm$ 0.08 <sup>AA</sup>  | 2.59 $\pm$ 0.17 <sup>b</sup> | 2.59 $\pm$ 0.09 <sup>b</sup>  | 2.25 $\pm$ 0.23 <sup>b</sup>  | 2.47 $\pm$ 0.12 <sup>b</sup>  | 2.37 $\pm$ 0.18 <sup>B</sup>  | 2.64 $\pm$ 0.12 <sup>B</sup>  | 0.83 $\pm$ 0.13 <sup>C</sup>  | 2.4 $\pm$ 0.13 <sup>B</sup>  |      |
| Oleic acid                                       | C18:1 c9       | 2.68 $\pm$ 0.94 <sup>AA</sup>  | 1.36 $\pm$ 0.82 <sup>a</sup>  | 2.45 $\pm$ 1.65 <sup>a</sup>  | u.q.l                        | 1.31 $\pm$ 0.3 <sup>1a</sup>  | 1.1 $\pm$ 0.48 <sup>A</sup>   | 1.14 $\pm$ 0.81 <sup>A</sup> | 3.18 $\pm$ 0.89 <sup>A</sup> | 3.73 $\pm$ 0.83 <sup>A</sup> | 9.63 $\pm$ 0.5 <sup>AA</sup>    | 4.16 $\pm$ 0.74 <sup>b</sup>   | 6.62 $\pm$ 0.70 <sup>ab</sup> | 1.86 $\pm$ 2.53 <sup>b</sup>  | 4.53 $\pm$ 1.78 <sup>ab</sup> | 4.3 $\pm$ 0.5 <sup>B</sup>    | 3.73 $\pm$ 0.82 <sup>B</sup>   | 4.75 $\pm$ 0.45 <sup>B</sup>  | 4.58 $\pm$ 2.30 <sup>B</sup>   | 10.02 $\pm$ 2.21 <sup>AA</sup> | 4.3 $\pm$ 0.78 <sup>b</sup>  | 5.95 $\pm$ 1.61 <sup>b</sup>  | 2.9 $\pm$ 0.94 <sup>b</sup>   | 3.38 $\pm$ 1.33 <sup>b</sup>  | 3.49 $\pm$ 0.65 <sup>B</sup>  | 2.92 $\pm$ 0.76 <sup>B</sup>  | 3.44 $\pm$ 1.28 <sup>B</sup>  | 6.75 $\pm$ 2.82 <sup>B</sup> |      |
| Linoleic acid                                    | C18:2 c9c12    | 1.42 $\pm$ 0.52 <sup>AA</sup>  | 1.2 $\pm$ 0.1 <sup>ab</sup>   | 1.08 $\pm$ 0.11 <sup>ab</sup> | 0.85 $\pm$ 0.1 <sup>3b</sup> | 0.95 $\pm$ 0.09 <sup>ab</sup> | 0.94 $\pm$ 0.04 <sup>AB</sup> | 0.92 $\pm$ 0.13 <sup>B</sup> | 0.88 $\pm$ 0.07 <sup>B</sup> | 0.75 $\pm$ 0.05 <sup>B</sup> | 10.93 $\pm$ 0.57 <sup>AA</sup>  | 4.97 $\pm$ 0.25 <sup>bc</sup>  | 5.4 $\pm$ 0.38 <sup>b</sup>   | 4.08 $\pm$ 0.34 <sup>c</sup>  | 0.85 $\pm$ 0.28 <sup>a</sup>  | 4.82 $\pm$ 0.13 <sup>B</sup>  | 4.63 $\pm$ 0.10 <sup>B</sup>   | 4.32 $\pm$ 0.02 <sup>B</sup>  | 4.39 $\pm$ 0.09 <sup>B</sup>   | n.d.                           | n.d.                         | n.d.                          | n.d.                          | n.d.                          | n.d.                          | n.d.                          | n.d.                          | n.d.                         |      |
| $\alpha$ -linolenic acid                         | C18:3 c9c12c15 | 0.41 $\pm$ 0.14 <sup>AA</sup>  | 0.58 $\pm$ 0.07 <sup>a</sup>  | 0.53 $\pm$ 0.04 <sup>a</sup>  | 0.41 $\pm$ 0.1 <sup>6a</sup> | 0.51 $\pm$ 0.03 <sup>a</sup>  | 0.49 $\pm$ 0.02 <sup>A</sup>  | 0.5 $\pm$ 0.04 <sup>A</sup>  | 0.46 $\pm$ 0.06 <sup>A</sup> | 0.48 $\pm$ 0.05 <sup>A</sup> | 1.07 $\pm$ 0.06 <sup>AA</sup>   | 0.68 $\pm$ 0.05 <sup>b</sup>   | 0.77 $\pm$ 0.04 <sup>b</sup>  | 0.62 $\pm$ 0.05 <sup>b</sup>  | 0.72 $\pm$ 0.16 <sup>b</sup>  | 0.67 $\pm$ 0.02 <sup>B</sup>  | 0.68 $\pm$ 0.01 <sup>B</sup>   | 0.63 $\pm$ 0.01 <sup>B</sup>  | 0.64 $\pm$ 0.01 <sup>B</sup>   | 2.17 $\pm$ 0.45 <sup>AA</sup>  | 0.92 $\pm$ 0.05 <sup>b</sup> | 0.89 $\pm$ 0.05 <sup>b</sup>  | 0.69 $\pm$ 0.07 <sup>b</sup>  | 0.72 $\pm$ 0.03 <sup>b</sup>  | 0.77 $\pm$ 0.04 <sup>B</sup>  | 0.57 $\pm$ 0.05 <sup>B</sup>  | 0.48 $\pm$ 0.05 <sup>B</sup>  | 0.42 $\pm$ 0.03 <sup>B</sup> |      |
| CLA isomer                                       | C18:2 t9t11    | n.d.                           | n.d.                          | n.d.                          | n.d.                         | n.d.                          | n.d.                          | n.d.                         | n.d.                         | n.d.                         | 0.21 $\pm$ 0.04 <sup>0b</sup>   | 1.21 $\pm$ 0.03 <sup>a</sup>   | 1.16 $\pm$ 0.37 <sup>a</sup>  | 0.99 $\pm$ 0.09 <sup>ab</sup> | 0.64 $\pm$ 0.02 <sup>bc</sup> | 1.04 $\pm$ 0.05 <sup>B</sup>  | 1.51 $\pm$ 0.14 <sup>A</sup>   | 0.83 $\pm$ 0.06 <sup>BC</sup> | 0.69 $\pm$ 0.04 <sup>C</sup>   | n.d.                           | n.d.                         | n.d.                          | n.d.                          | n.d.                          | n.d.                          | n.d.                          | n.d.                          | n.d.                         | n.d. |
| Eicosape ntaenoic acid (EPA)                     | C20:5 n-3      | 2.12 $\pm$ 0.98 <sup>AA</sup>  | 1.65 $\pm$ 0.31 <sup>a</sup>  | 1.38 $\pm$ 0.28 <sup>a</sup>  | 1.3 $\pm$ 0.13 <sup>a</sup>  | 1.49 $\pm$ 0.1 <sup>8a</sup>  | 1.15 $\pm$ 0.11 <sup>B</sup>  | 0.9 $\pm$ 0.31 <sup>B</sup>  | 1.09 $\pm$ 0.15 <sup>B</sup> | 1.08 $\pm$ 0.13 <sup>B</sup> | n.d.                            | n.d.                           | n.d.                          | n.d.                          | n.d.                          | n.d.                          | n.d.                           | n.d.                          | n.d.                           | 18.91 $\pm$ 7.77 <sup>AA</sup> | 6.13 $\pm$ 0.23 <sup>b</sup> | 5.58 $\pm$ 0.52 <sup>b</sup>  | 5.82 $\pm$ 0.34 <sup>b</sup>  | 6.34 $\pm$ 0.44 <sup>b</sup>  | 4.25 $\pm$ 0.16 <sup>B</sup>  | 1.27 $\pm$ 0.14 <sup>B</sup>  | 4.85 $\pm$ 0.22 <sup>B</sup>  | 4.62 $\pm$ 0.52 <sup>B</sup> |      |
| Punicic acid                                     | C18:3 c9t11c13 | 10.58 $\pm$ 4.92 <sup>AA</sup> | 0.65 $\pm$ 0.16 <sup>b</sup>  | 0.48 $\pm$ 0.20 <sup>b</sup>  | 0.62 $\pm$ 0.05 <sup>b</sup> | 0.5 $\pm$ 0.05 <sup>b</sup>   | 0.44 $\pm$ 0.08 <sup>B</sup>  | 0.31 $\pm$ 0.19 <sup>B</sup> | 0.45 $\pm$ 0.15 <sup>B</sup> | 0.4 $\pm$ 0.10 <sup>B</sup>  | 119.03 $\pm$ 6.82 <sup>AA</sup> | 3.75 $\pm$ 0.21 <sup>b</sup>   | 4.17 $\pm$ 0.65 <sup>b</sup>  | 3.42 $\pm$ 0.31 <sup>b</sup>  | 2.68 $\pm$ 0.73 <sup>b</sup>  | 3.61 $\pm$ 0.39 <sup>B</sup>  | 3.68 $\pm$ 0.21 <sup>B</sup>   | 3.14 $\pm$ 0.14 <sup>B</sup>  | 3.04 $\pm$ 0.24 <sup>B</sup>   | n.d.                           | n.d.                         | n.d.                          | n.d.                          | n.d.                          | n.d.                          | n.d.                          | n.d.                          | n.d.                         |      |
| $\alpha$ -eleostearic acid                       | C18:3 c9t11t13 | n.d.                           | n.d.                          | n.d.                          | n.d.                         | n.d.                          | n.d.                          | n.d.                         | n.d.                         | n.d.                         | 5.8 $\pm$ 0.4 <sup>3A</sup>     | 0.99 $\pm$ 0.04 <sup>b</sup>   | 0.91 $\pm$ 0.23 <sup>bc</sup> | 0.75 $\pm$ 0.05 <sup>bc</sup> | 0.45 $\pm$ 0.11 <sup>c</sup>  | 0.78 $\pm$ 0.29 <sup>B</sup>  | 0.86 $\pm$ 0.03 <sup>B</sup>   | 0.67 $\pm$ 0.06 <sup>B</sup>  | 0.55 $\pm$ 0.03 <sup>B</sup>   | n.d.                           | n.d.                         | n.d.                          | n.d.                          | n.d.                          | n.d.                          | n.d.                          | n.d.                          | n.d.                         |      |
| catalpic acid                                    | C18:3 t9t11c13 | 0.57 $\pm$ 0.19 <sup>AA</sup>  | 0.76 $\pm$ 0.16 <sup>a</sup>  | 0.54 $\pm$ 0.23 <sup>a</sup>  | 0.54 $\pm$ 0.07 <sup>a</sup> | 0.51 $\pm$ 0.07 <sup>a</sup>  | 0.51 $\pm$ 0.12 <sup>A</sup>  | 0.34 $\pm$ 0.21 <sup>A</sup> | 0.4 $\pm$ 0.08 <sup>A</sup>  | 0.43 $\pm$ 0.13 <sup>A</sup> | 5.82 $\pm$ 0.39 <sup>AA</sup>   | 4.27 $\pm$ 0.31 <sup>bc</sup>  | 4.72 $\pm$ 0.68 <sup>ab</sup> | 3.77 $\pm$ 0.35 <sup>bc</sup> | 3.14 $\pm$ 0.74 <sup>c</sup>  | 4.12 $\pm$ 0.52 <sup>B</sup>  | 4.11 $\pm$ 0.20 <sup>B</sup>   | 3.5 $\pm$ 0.09 <sup>B</sup>   | 3.37 $\pm$ 0.22 <sup>B</sup>   | n.d.                           | n.d.                         | n.d.                          | n.d.                          | n.d.                          | n.d.                          | n.d.                          | n.d.                          | n.d.                         |      |
| $\beta$ -eleostearic acid                        | C18:3 t9t11t13 | 1.13 $\pm$ 0.20 <sup>AA</sup>  | 2.18 $\pm$ 0.62 <sup>ab</sup> | 1.6 $\pm$ 0.79 <sup>ab</sup>  | 1.91 $\pm$ 0.2 <sup>5b</sup> | 2.73 $\pm$ 0.2 <sup>8a</sup>  | 1.44 $\pm$ 0.31 <sup>A</sup>  | 1.11 $\pm$ 0.66 <sup>A</sup> | 1.75 $\pm$ 0.34 <sup>A</sup> | 2.26 $\pm$ 0.57 <sup>A</sup> | 10.42 $\pm$ 0.67 <sup>CC</sup>  | 21.15 $\pm$ 2.36 <sup>bc</sup> | 42.57 $\pm$ 7.25 <sup>a</sup> | 32.6 $\pm$ 3.95 <sup>ab</sup> | 40.32 $\pm$ 4.37 <sup>a</sup> | 27.14 $\pm$ 7.45 <sup>B</sup> | 34.29 $\pm$ 2.46 <sup>AB</sup> | 33.47 $\pm$ 0.9 <sup>AB</sup> | 39.8 $\pm$ 0.07 <sup>A</sup>   | n.d.                           | n.d.                         | n.d.                          | n.d.                          | n.d.                          | n.d.                          | n.d.                          | n.d.                          | n.d.                         |      |
| Docosap entaenoic acid (DPA)                     | C22:5 n-3      | 0.55 $\pm$ 0.22 <sup>AA</sup>  | 0.24 $\pm$ 0.04 <sup>b</sup>  | 0.17 $\pm$ 0.03 <sup>b</sup>  | 0.19 $\pm$ 0.04 <sup>b</sup> | 0.26 $\pm$ 0.02 <sup>b</sup>  | 0.18 $\pm$ 0.02 <sup>B</sup>  | 0.11 $\pm$ 0.04 <sup>B</sup> | 0.19 $\pm$ 0.03 <sup>B</sup> | 0.22 $\pm$ 0.05 <sup>B</sup> | n.d.                            | n.d.                           | n.d.                          | n.d.                          | n.d.                          | n.d.                          | n.d.                           | n.d.                          | n.d.                           | 3.94 $\pm$ 1.22 <sup>AA</sup>  | 1.04 $\pm$ 0.04 <sup>b</sup> | 1.06 $\pm$ 0.11 <sup>b</sup>  | 1.14 $\pm$ 0.09 <sup>b</sup>  | 1.34 $\pm$ 0.08 <sup>b</sup>  | 0.78 $\pm$ 0.04 <sup>B</sup>  | 0.68 $\pm$ 0.08 <sup>B</sup>  | 1.13 $\pm$ 0.04 <sup>B</sup>  | 1.12 $\pm$ 0.08 <sup>B</sup> |      |
| Docosah exaenoic acid (DHA)                      | C22:6 n-3      | 1.51 $\pm$ 0.67 <sup>AA</sup>  | 0.66 $\pm$ 0.16 <sup>b</sup>  | 0.52 $\pm$ 0.19 <sup>b</sup>  | 0.56 $\pm$ 0.1 <sup>1b</sup> | 0.78 $\pm$ 0.1 <sup>b</sup>   | 0.48 $\pm$ 0.07 <sup>B</sup>  | 0.29 $\pm$ 0.12 <sup>B</sup> | 0.52 $\pm$ 0.02 <sup>B</sup> | 0.51 $\pm$ 0.21 <sup>B</sup> | n.d.                            | n.d.                           | n.d.                          | n.d.                          | n.d.                          | n.d.                          | n.d.                           | n.d.                          | n.d.                           | 11.1 $\pm$ 4.43 <sup>AA</sup>  | 2.69 $\pm$ 0.12 <sup>b</sup> | 2.61 $\pm$ 0.23 <sup>b</sup>  | 3.06 $\pm$ 0.25 <sup>b</sup>  | 3.57 $\pm$ 0.22 <sup>b</sup>  | 2.00 $\pm$ 0.10 <sup>B</sup>  | 1.48 $\pm$ 0.09 <sup>B</sup>  | 2.9 $\pm$ 0.27 <sup>B</sup>   | 3.7 $\pm$ 0.27 <sup>B</sup>  |      |

**Table 2** pH values of the different samples at the different fermentation times (0, 6, 12, 24 and 48 h). CD-Control Diet and WD- Western Diet model. The values presented are the means of three biological replicates  $\pm$  standard deviation. Different letters indicate significant differences ( $p < 0.05$ ). The capital letters (A,B,C) indicate the differences among samples Negative control, Positive control (FOS) and bioactive lipids sources (Fish oil, Pomegranate oil and a mixture of both) at the same time. The small letters (a,b,c) indicate the differences for the same sample over time.

| Time (h) | Negative control CD              | Negative control WD              | FOS CD                          | FOS WD                         | Fish oil CD                     | Fish oil WD                    | Pomegranate oil CD               | Pomegranate oil WD             | Fish oil+Pomegranate oil CD     | Fish oil+Pomegranate oil WD     |
|----------|----------------------------------|----------------------------------|---------------------------------|--------------------------------|---------------------------------|--------------------------------|----------------------------------|--------------------------------|---------------------------------|---------------------------------|
| 0        | 7.33 $\pm$ 0.15 <sup>a</sup>     | 7.48 $\pm$ 0.08 <sup>a</sup>     | 7.33 $\pm$ 0.15 <sup>a</sup>    | 7.48 $\pm$ 0.08 <sup>a</sup>   | 7.33 $\pm$ 0.15 <sup>a</sup>    | 7.48 $\pm$ 0.08 <sup>a</sup>   | 7.33 $\pm$ 0.15 <sup>a</sup>     | 7.48 $\pm$ 0.08 <sup>a</sup>   | 7.33 $\pm$ 0.15 <sup>a</sup>    | 7.48 $\pm$ 0.08 <sup>a</sup>    |
| 6        | 6.69 $\pm$ 0.46 <sup>b,A</sup>   | 6.17 $\pm$ 0.01 <sup>b,B</sup>   | 5.05 $\pm$ 0.15 <sup>b,C</sup>  | 4.92 $\pm$ 0.01 <sup>b,C</sup> | 6.56 $\pm$ 0.03 <sup>b,AB</sup> | 6.20 $\pm$ 0.01 <sup>c,B</sup> | 6.41 $\pm$ 0.04 <sup>b,AB</sup>  | 6.2 $\pm$ 0.02 <sup>c,B</sup>  | 6.33 $\pm$ 0.02 <sup>b,AB</sup> | 6.19 $\pm$ 0.00 <sup>c,B</sup>  |
| 12       | 6.42 $\pm$ 0.18 <sup>b,AB</sup>  | 6.07 $\pm$ 0.03 <sup>c,B</sup>   | 4.45 $\pm$ 0.07 <sup>c,E</sup>  | 4.91 $\pm$ 0.03 <sup>b,D</sup> | 6.39 $\pm$ 0.02 <sup>b,AB</sup> | 6.17 $\pm$ 0.01 <sup>c,C</sup> | 6.29 $\pm$ 0.04 <sup>bc,BC</sup> | 6.18 $\pm$ 0.02 <sup>c,C</sup> | 6.2 $\pm$ 0.04 <sup>b,C</sup>   | 6.19 $\pm$ 0.01 <sup>c,C</sup>  |
| 24       | 6.28 $\pm$ 0.15 <sup>b,A</sup>   | 6.19 $\pm$ 0.01 <sup>b,A</sup>   | 4.29 $\pm$ 0.02 <sup>cd,B</sup> | 4.83 $\pm$ 0.07 <sup>b,B</sup> | 6.18 $\pm$ 0.03 <sup>c,A</sup>  | 6.22 $\pm$ 0 <sup>bc,A</sup>   | 6.21 $\pm$ 0.04 <sup>bc,A</sup>  | 6.25 $\pm$ 0.03 <sup>c,A</sup> | 6.22 $\pm$ 0.06 <sup>b,A</sup>  | 6.22 $\pm$ 0.02 <sup>bc,A</sup> |
| 48       | 6.28 $\pm$ 0.17 <sup>b,ABC</sup> | 6.26 $\pm$ 0.02 <sup>b,ABC</sup> | 4.18 $\pm$ 0.02 <sup>d,E</sup>  | 4.35 $\pm$ 0.01 <sup>c,D</sup> | 6.12 $\pm$ 0.02 <sup>d,C</sup>  | 6.37 $\pm$ 0.01 <sup>b,A</sup> | 6.14 $\pm$ 0.07 <sup>c,BC</sup>  | 6.36 $\pm$ 0.02 <sup>b,A</sup> | 6.14 $\pm$ 0.03 <sup>b,BC</sup> | 6.31 $\pm$ 0.01 <sup>b,AB</sup> |

**Table 3** Amino acids concentration values (mg of amino acid/L of sample) of the different samples at the different fermentation times (0, 6, 12, 24 and 48 h). CD-Control Diet and WD- Western Diet model. The values presented are the means of three biological replicates  $\pm$  standard deviation. Different letters indicate significant differences ( $p < 0.05$ ). The capital letters (A,B,C) indicate the differences among samples Negative control, Positive control (FOS) and bioactive lipids sources (Fish oil, Pomegranate oil and a mixture of both) at the same time. The small letters (a,b,c) indicate the differences for the same sample over time.

| Sample              | Time (h) | Amino acids (mg/L)                          |                                              |                                               |                                             |                                             |                                                |                                            |                                              |                                              |                                              |                                                 |                                                |                                              |                                               |                                                |                                                 |                                              |
|---------------------|----------|---------------------------------------------|----------------------------------------------|-----------------------------------------------|---------------------------------------------|---------------------------------------------|------------------------------------------------|--------------------------------------------|----------------------------------------------|----------------------------------------------|----------------------------------------------|-------------------------------------------------|------------------------------------------------|----------------------------------------------|-----------------------------------------------|------------------------------------------------|-------------------------------------------------|----------------------------------------------|
|                     |          | Aspartic acid                               | Glutamic acid                                | Cysteine                                      | Asparagine                                  | Serine                                      | Glycine                                        | Threonine                                  | Arginine                                     | Alanine                                      | GABA                                         | Tyrosine                                        | Valine                                         | Methionine                                   | Tryptophan                                    | Phenylalanine                                  | Isoleucine                                      | Leucine                                      |
| Negative control CD | 0        | 16.37 $\pm$ 1.06                            | 34.49 $\pm$ 3.38                             | 10.86 $\pm$ 1.89                              | 16.6 $\pm$ 1.38                             | 23.65 $\pm$ 1.6                             | 10.78 $\pm$ 1.8                                | 18.46 $\pm$ 1.42                           | 29.67 $\pm$ 1.89                             | 29.18 $\pm$ 2.74                             | 4.7 $\pm$ 0.71                               | 8.87 $\pm$ 1.04                                 | 27.47 $\pm$ 2.02                               | 8.52 $\pm$ 0.62                              | 4.42 $\pm$ 0.46                               | 25.53 $\pm$ 2.24                               | 21.76 $\pm$ 1.91                                | 34.33 $\pm$ 2.5                              |
|                     | 6        | 27.73 $\pm$ 2.7 <sup>A</sup>                | 43.96 $\pm$ 0.4 <sup>b,C</sup> <sub>D</sub>  | 23.16 $\pm$ 2.31 <sub>a,AB</sub>              | 29.99 $\pm$ 0.8 <sub>7a,BC</sub>            | 41.23 $\pm$ 1.5 <sub>9a,AB</sub>            | 34.78 $\pm$ 2.31 <sub>a,D</sub>                | 36.05 $\pm$ 1.76 <sub>a,AB</sub>           | 48 $\pm$ 3.34 <sup>a,A</sup>                 | 39.41 $\pm$ 1.2 <sub>5c,DE</sub>             | 12.87 $\pm$ 0.83 <sub>B</sub>                | 16.4 $\pm$ 1.02 <sup>ab</sup> <sub>CD</sub>     | 45.36 $\pm$ 2.46 <sup>a,BC</sup> <sub>D</sub>  | 17.5 $\pm$ 0.65 <sup>a,C</sup> <sub>D</sub>  | 8.92 $\pm$ 0.46 <sup>a,DEF</sup>              | 49.16 $\pm$ 3.4 <sup>a,DE</sup>                | 37.49 $\pm$ 3.94 <sup>ab,A</sup> <sub>BC</sub>  | 53.93 $\pm$ 2.93 <sub>ab,BC</sub>            |
|                     | 12       | 18.84 $\pm$ 2.2 <sup>b</sup> <sub>A</sub>   | 73.43 $\pm$ 4.74 <sup>A</sup> <sub>a</sub>   | 10.45 $\pm$ 2.77 <sub>b,ABC</sub>             | 22.74 $\pm$ 4.0 <sub>4<sup>b</sup>,B</sub>  | 34.82 $\pm$ 4.5 <sub>4<sup>a</sup>,B</sub>  | 32.29 $\pm$ 7.7 <sup>a</sup> <sub>B</sub>      | 30.87 $\pm$ 0.48 <sub>b,A</sub>            | 15.52 $\pm$ 2.48 <sub>b,AB</sub>             | 69.96 $\pm$ 5.5 <sub>3<sup>ab</sup>,BC</sub> | 19.2 $\pm$ 1.95 <sup>bc</sup> <sub>B</sub>   | 21.79 $\pm$ 9.63 <sup>a</sup> <sub>AB</sub>     | 44.4 $\pm$ 0.7 <sub>3<sup>a</sup>,ABC</sub>    | 12.37 $\pm$ 2.34 <sup>b</sup> <sub>BC</sub>  | 6.67 $\pm$ 0.68 <sup>a,BC</sup>               | 40.52 $\pm$ 9.43 <sup>ab,BC</sup>              | 32.86 $\pm$ 5.1 <sup>b,AB</sup>                 | 51.88 $\pm$ 0.25 <sub>b,AB</sub>             |
|                     | 24       | 3.86 $\pm$ 0.99 <sup>c</sup> <sub>B</sub>   | 77.72 $\pm$ 7.23 <sup>A</sup> <sub>A</sub>   | 5.98 $\pm$ 0.58 <sup>bc</sup> <sub>BC</sub>   | 0.36 $\pm$ 0.06 <sup>c</sup> <sub>B</sub>   | 2.91 $\pm$ 0.29 <sub>b,BCD</sub>            | 47.8 $\pm$ 3.85 <sup>a</sup> <sub>ABC</sub>    | 3.32 $\pm$ 1.05 <sup>c</sup> <sub>DE</sub> | 9.83 $\pm$ 4.13 <sup>b</sup> <sub>C</sub>    | 78.95 $\pm$ 7.6 <sub>7<sup>a</sup>,A</sub>   | 27.96 $\pm$ 5.73 <sup>b</sup> <sub>DE</sub>  | 3.54 $\pm$ 0.41 <sup>b,c</sup>                  | 49.76 $\pm$ 1.11 <sup>a,AB</sup>               | 19.11 $\pm$ 0.35 <sup>a</sup> <sub>BC</sub>  | 6.62 $\pm$ 1.59 <sup>a,ABC</sup>              | 34.73 $\pm$ 1.92 <sup>b,B</sup>                | 43.34 $\pm$ 1.59 <sup>a,BC</sup>                | 59.5 $\pm$ 2.53 <sup>b</sup> <sub>CD</sub>   |
|                     | 48       | 2.67 $\pm$ 0.21 <sup>c</sup> <sub>B</sub>   | 75.2 $\pm$ 5.58 <sup>a,A</sup>               | 1.32 $\pm$ 0.34 <sup>c,C</sup>                | 0.2 $\pm$ 0.05 <sup>c,B</sup>               | 1.78 $\pm$ 0.19 <sub>b,BC</sub>             | 42.75 $\pm$ 15.7 <sub>6<sup>a</sup>,ABC</sub>  | 4.01 $\pm$ 0.74 <sup>c,C</sup>             | 10.97 $\pm$ 3.39 <sub>b,ABC</sub>            | 64.6 $\pm$ 4.27 <sub>b,AB</sub>              | 43.21 $\pm$ 4.87 <sup>a</sup> <sub>CD</sub>  | 18.8 $\pm$ 4.63 <sup>a,C</sup>                  | 48 $\pm$ 4.54 <sup>a</sup> <sub>A</sub>        | 13.24 $\pm$ 0.24 <sup>b</sup> <sub>CD</sub>  | 6.32 $\pm$ 1.37 <sup>a,B</sup>                | 33.43 $\pm$ 3.19 <sup>b,AB</sup>               | 36.87 $\pm$ 2.24 <sup>ab,A</sup>                | 50.02 $\pm$ 4.13 <sub>b,CD</sub>             |
| Negative control WD | 0        | 12.75 $\pm$ 0.84                            | 47.59 $\pm$ 13.3 <sub>1</sub>                | 10.77 $\pm$ 1.26                              | 13.54 $\pm$ 3.6 <sub>5</sub>                | 1.67 $\pm$ 0.22                             | 18.86 $\pm$ 7.92                               | 21.17 $\pm$ 4.63                           | 42.69 $\pm$ 16.4 <sub>6</sub>                | 48.47 $\pm$ 20.14                            | 20.64 $\pm$ 12.8                             | 10.22 $\pm$ 2.26                                | 33.82 $\pm$ 6.95                               | 12.3 $\pm$ 3.05                              | 5.54 $\pm$ 1.02                               | 29.65 $\pm$ 4.69                               | 26.48 $\pm$ 6.1                                 | 41.01 $\pm$ 6.02                             |
|                     | 6        | 3.35 $\pm$ 0.19 <sup>a</sup> <sub>C</sub>   | 57.41 $\pm$ 2.05 <sup>b</sup> <sub>AB</sub>  | 7.96 $\pm$ 0.68 <sup>a</sup> <sub>C</sub>     | 0.59 $\pm$ 0.00 <sub>b,D</sub>              | 1.19 $\pm$ 0.02 <sup>a</sup> <sub>C</sub>   | 53.42 $\pm$ 2.18 <sub>a,B</sub>                | 0.9 $\pm$ 0.07 <sup>b,C</sup>              | 14.06 $\pm$ 0.52 <sub>a,BC</sub>             | 50.5 $\pm$ 1.43 <sub>b,BC</sub>              | 22.75 $\pm$ 1.08 <sup>b</sup> <sub>B</sub>   | 14.62 $\pm$ 0.49 <sup>a</sup> <sub>E</sub>      | 56.57 $\pm$ 1.52 <sup>a,AB</sup> <sub>BC</sub> | 19.8 $\pm$ 0.81 <sup>a,A</sup> <sub>BC</sub> | 13.19 $\pm$ 1.18 <sup>a,AB</sup>              | 52.72 $\pm$ 3.69 <sup>a,CDE</sup>              | 46.1 $\pm$ 1.57 <sup>a,AB</sup>                 | 65.73 $\pm$ 2.87 <sub>a,ABC</sub>            |
|                     | 12       | 2.63 $\pm$ 0.01 <sup>a</sup> <sub>B</sub>   | 81.19 $\pm$ 8.89 <sup>A</sup> <sub>A</sub>   | 4.62 $\pm$ 0.57 <sup>b</sup> <sub>CED</sub>   | 0.61 $\pm$ 0.13 <sub>b,C</sub>              | 1.07 $\pm$ 0.18 <sup>a</sup> <sub>D</sub>   | 39.00 $\pm$ 2.00 <sub>b,ABC</sub>              | 2.86 $\pm$ 0.57 <sup>a</sup> <sub>B</sub>  | 11.05 $\pm$ 0.88 <sub>ab,BC</sub>            | 64.43 $\pm$ 2.6 <sub>7<sup>a</sup>,BC</sub>  | 9.97 $\pm$ 0.14 <sup>c,B</sup>               | 6.22 $\pm$ 0.44 <sup>c,C</sup>                  | 53.36 $\pm$ 3.53 <sup>a,AB</sup>               | 16.57 $\pm$ 1.59 <sup>a</sup> <sub>AB</sub>  | 7.4 $\pm$ 0.21 <sup>b,B</sup>                 | 47.75 $\pm$ 3.64 <sup>a,ABC</sup>              | 35.83 $\pm$ 1.93 <sup>a,AB</sup>                | 57.99 $\pm$ 3.37 <sub>b,AB</sub>             |
|                     | 24       | 2.55 $\pm$ 0.19 <sup>b</sup> <sub>B</sub>   | 71.03 $\pm$ 7.26 <sup>a</sup> <sub>b,A</sub> | 5.42 $\pm$ 0.48 <sup>b</sup> <sub>C</sub>     | <0.05                                       | 1.49 $\pm$ 0.25 <sup>a</sup> <sub>CD</sub>  | 40.91 $\pm$ 1.79 <sub>b,C</sub>                | 2.56 $\pm$ 0.8 <sup>a,E</sup>              | 12.05 $\pm$ 2.4 <sup>a</sup> <sub>b,BC</sub> | 77.59 $\pm$ 5.9 <sub>1<sup>a</sup>,A</sub>   | 43.06 $\pm$ 6.33 <sup>a</sup> <sub>DE</sub>  | 7.6 $\pm$ 0.45 <sup>b,C</sup>                   | 49.41 $\pm$ 5.78 <sup>a,AB</sup>               | 16.74 $\pm$ 2.07 <sup>a</sup> <sub>CD</sub>  | 7.46 $\pm$ 0.19 <sup>b,AB</sup>               | 35.64 $\pm$ 2.12 <sup>b,B</sup>                | 41.65 $\pm$ 4.25 <sup>ab,B</sup> <sub>C</sub>   | 53.06 $\pm$ 3.35 <sub>b,C</sub>              |
|                     | 48       | 2.53 $\pm$ 0.73 <sup>a</sup> <sub>B</sub>   | 1.37 $\pm$ 0.38 <sup>c,B</sup>               | 4.68 $\pm$ 0.79 <sup>b</sup> <sub>B</sub>     | 0.88 $\pm$ 0.14 <sup>a</sup> <sub>B</sub>   | 0.64 $\pm$ 0.11 <sub>b,C</sub>              | 27.8 $\pm$ 6.24 <sup>c,A</sup> <sub>BC</sub>   | 1.09 $\pm$ 0.1 <sup>b,C</sup>              | 8.83 $\pm$ 1.18 <sup>b</sup> <sub>CD</sub>   | 42.82 $\pm$ 0.2 <sub>2<sup>c</sup>,C</sub>   | 22.34 $\pm$ 3.65 <sup>b</sup> <sub>D</sub>   | 2.29 $\pm$ 0.6 <sup>d,C</sup>                   | 23.04 $\pm$ 6.28 <sup>b</sup> <sub>E</sub>     | 7.81 $\pm$ 1.02 <sup>b,D</sup> <sub>E</sub>  | 4.04 $\pm$ 0.56 <sup>b,CDE</sup>              | 13.99 $\pm$ 0.48 <sup>c,C</sup>                | 6.27 $\pm$ 0.12 <sup>c,B</sup>                  | 9.41 $\pm$ 1.05 <sup>c</sup> <sub>E</sub>    |
| FOS CD              | 6        | 29.52 $\pm$ 0.65 <sup>a</sup> <sub>A</sub>  | 50.47 $\pm$ 2.08 <sup>c</sup> <sub>BC</sub>  | 24.57 $\pm$ 0.71 <sub>a,A</sub>               | 26.57 $\pm$ 1.5 <sub>9<sup>a</sup>,BC</sub> | 47.13 $\pm$ 1.8 <sub>3<sup>a</sup>,A</sub>  | 45.81 $\pm$ 2.06 <sub>ab,CD</sub>              | 40.13 $\pm$ 0.92 <sub>a,A</sub>            | 41.1 $\pm$ 5.88 <sup>a</sup> <sub>A</sub>    | 44.46 $\pm$ 2.6 <sub>4<sup>d</sup>,CD</sub>  | 14.6 $\pm$ 2.7 <sup>c,B</sup>                | 17.41 $\pm$ 0.7 <sup>b,B</sup> <sub>CD</sub>    | 49.87 $\pm$ 2.07 <sup>ab,ABC</sup>             | 17.81 $\pm$ 0.49 <sup>a</sup> <sub>CD</sub>  | 9.96 $\pm$ 0.52 <sup>a,CDE</sup>              | 47.52 $\pm$ 1.6 <sup>a,DE</sup>                | 40.63 $\pm$ 1.9 <sup>a,ABC</sup>                | 61.98 $\pm$ 4.37 <sub>a,ABC</sub>            |
|                     | 12       | 18.76 $\pm$ 3.76 <sub>b,A</sub>             | 64.69 $\pm$ 8.77 <sup>a</sup> <sub>c,A</sub> | 9.23 $\pm$ 2.42 <sup>c,A</sup> <sub>BCD</sub> | 17.56 $\pm$ 1.1 <sub>3<sup>ac</sup>,B</sub> | 33.3 $\pm$ 1.9 <sup>b</sup> <sub>B</sub>    | 36.6 $\pm$ 3.63 <sup>b</sup> <sub>ABC</sub>    | 28.32 $\pm$ 1.83 <sup>c</sup> <sub>A</sub> | 16.01 $\pm$ 1.77 <sub>b,AB</sub>             | 65.38 $\pm$ 1.8 <sub>6<sup>c</sup>,BC</sub>  | 18.49 $\pm$ 2.33 <sup>b</sup> <sub>B</sub>   | 19.25 $\pm$ 1.53 <sup>b</sup> <sub>AB</sub>     | 37.23 $\pm$ 3.54 <sup>a,C</sup>                | 11.2 $\pm$ 0.73 <sup>b,C</sup>               | 6.57 $\pm$ 0.37 <sup>c,BC</sup>               | 36.13 $\pm$ 5.17 <sup>ab,BC</sup>              | 29.48 $\pm$ 5.07 <sup>b,B</sup>                 | 46.94 $\pm$ 1.26 <sub>b,B</sub>              |
|                     | 24       | 22.89 $\pm$ 1.79 <sub>ab,A</sub>            | 83.19 $\pm$ 2.59 <sup>a</sup> <sub>b,A</sub> | 15.07 $\pm$ 1.77 <sub>b,A</sub>               | 24.24 $\pm$ 0.6 <sub>4<sup>ab</sup>,A</sub> | 46.64 $\pm$ 1.9 <sub>2<sup>a</sup>,A</sub>  | 59.93 $\pm$ 3.94 <sub>a,A</sub>                | 38.43 $\pm$ 0.85 <sub>ab,A</sub>           | 15.8 $\pm$ 1.92 <sup>b</sup> <sub>AB</sub>   | 85.38 $\pm$ 1.2 <sub>5<sup>a</sup>,A</sub>   | 75.78 $\pm$ 16.51 <sub>a,B</sub>             | 57.31 $\pm$ 13.33 <sub>a,A</sub>                | 42.27 $\pm$ 9.85 <sup>a,B</sup>                | 17.23 $\pm$ 1.49 <sup>a</sup> <sub>CD</sub>  | 8.58 $\pm$ 0.25 <sup>b,A</sup>                | 35.46 $\pm$ 1.34 <sup>ab,B</sup>               | 42.26 $\pm$ 0.27 <sup>a,BC</sup>                | 61.09 $\pm$ 0.99 <sub>a,B</sub>              |
|                     | 48       | 25.94 $\pm$ 4.27 <sub>ab,A</sub>            | 91.97 $\pm$ 16.7 <sub>5<sup>a</sup>,A</sub>  | 15.12 $\pm$ 0.62 <sub>b,A</sub>               | 20.4 $\pm$ 2.56 <sub>bc,A</sub>             | 38.25 $\pm$ 2.6 <sub>5<sup>b</sup>,A</sub>  | 47.99 $\pm$ 10.7 <sub>ab,AB</sub>              | 33.89 $\pm$ 2.7 <sup>b</sup> <sub>A</sub>  | 10.58 $\pm$ 2.45 <sub>b,BCD</sub>            | 75.09 $\pm$ 4.1 <sub>7<sup>b</sup>,A</sub>   | 90.43 $\pm$ 21.92 <sub>a,BCD</sub>           | 48.33 $\pm$ 14.75 <sub>a,B</sub>                | 48.31 $\pm$ 10.15 <sup>a,A</sup>               | 13.44 $\pm$ 1.08 <sup>b</sup> <sub>C</sub>   | 8.32 $\pm$ 0.19 <sup>b,A</sup>                | 30.36 $\pm$ 7.78 <sup>b,B</sup>                | 39.88 $\pm$ 6.54 <sup>ab,A</sup>                | 57.58 $\pm$ 0.08 <sub>a,ABC</sub>            |
| FOS WD              | 6        | 2.75 $\pm$ 0.3 <sup>b,C</sup>               | 23.39 $\pm$ 6.68 <sup>a</sup> <sub>E</sub>   | 6.89 $\pm$ 0.49 <sup>b</sup> <sub>C</sub>     | 0.6 $\pm$ 0.14 <sup>b</sup> <sub>D</sub>    | 1.48 $\pm$ 0.17 <sup>c</sup> <sub>C</sub>   | 67.65 $\pm$ 0.98 <sub>a,A</sub>                | 30.87 $\pm$ 2.93 <sub>b,B</sub>            | 14.4 $\pm$ 1.69 <sup>b</sup> <sub>BC</sub>   | 61.81 $\pm$ 2.5 <sub>8<sup>bc</sup>,A</sub>  | 79.57 $\pm$ 29.41 <sub>b,A</sub>             | 12.45 $\pm$ 0.82 <sup>a</sup> <sub>E</sub>      | 50.57 $\pm$ 10.88 <sup>ab,ABC</sup>            | 18.52 $\pm$ 3 <sup>a,BCD</sup>               | 15.79 $\pm$ 0.32 <sup>a,A</sup>               | 52.64 $\pm$ 9.12 <sup>a,CDE</sup>              | 40.35 $\pm$ 9.58 <sup>ab,ABC</sup> <sub>C</sub> | 72.28 $\pm$ 9.47 <sub>a,A</sub>              |
|                     | 12       | 3.41 $\pm$ 0.16 <sup>a</sup> <sub>B</sub>   | 4.17 $\pm$ 0.24 <sup>b,B</sup>               | 9.9 $\pm$ 0.75 <sup>a,AB</sup> <sub>C</sub>   | 0.47 $\pm$ 0.01 <sub>b,C</sub>              | 2.47 $\pm$ 0.14 <sup>a</sup> <sub>b,D</sub> | 47.73 $\pm$ 2.45 <sub>b,A</sub>                | 37.26 $\pm$ 0.74 <sub>a,A</sub>            | 17.07 $\pm$ 1.46 <sub>a,A</sub>              | 49.47 $\pm$ 9.3 <sub>1<sup>c</sup>,C</sub>   | 80.65 $\pm$ 19.12 <sub>b,A</sub>             | 12.7 $\pm$ 0.15 <sup>a,B</sup> <sub>C</sub>     | 56.85 $\pm$ 3.89 <sup>ab,A</sup>               | 20.19 $\pm$ 1.27 <sup>a</sup> <sub>A</sub>   | 11.82 $\pm$ 1.08 <sup>b,A</sup>               | 58.42 $\pm$ 3.12 <sup>a,A</sup>                | 43.77 $\pm$ 1.23 <sup>a,A</sup>                 | 62.31 $\pm$ 1.39 <sub>ab,A</sub>             |
|                     | 24       | 2.38 $\pm$ 0.05 <sup>b</sup> <sub>B</sub>   | 2.35 $\pm$ 0.14 <sup>b,B</sup>               | 3.73 $\pm$ 0.09 <sup>c,C</sup> <sub>D</sub>   | 0.18 $\pm$ 0.01 <sup>c</sup> <sub>B</sub>   | 2.02 $\pm$ 0.22 <sub>b,CD</sub>             | 43.38 $\pm$ 3.08 <sub>b,BC</sub>               | 22.42 $\pm$ 1.21 <sup>c</sup> <sub>B</sub> | 9.87 $\pm$ 0.73 <sup>c</sup> <sub>C</sub>    | 76.47 $\pm$ 2.0 <sub>5<sup>a</sup>,AB</sub>  | 144.86 $\pm$ 12.0 <sub>6<sup>a</sup>,A</sub> | 7.4 $\pm$ 0.91 <sup>b,C</sup>                   | 42.61 $\pm$ 1.04 <sup>b,B</sup>                | 14.61 $\pm$ 0.49 <sup>a</sup> <sub>D</sub>   | 7.77 $\pm$ 1.02 <sup>c,AB</sup>               | 31.72 $\pm$ 1.22 <sup>b,BC</sup>               | 34.86 $\pm$ 1.19 <sup>a,D</sup>                 | 49.67 $\pm$ 1.71 <sub>b,CD</sub>             |
|                     | 48       | 3.18 $\pm$ 0.24 <sup>a</sup> <sub>b,B</sub> | 2.97 $\pm$ 0.04 <sup>b,B</sup>               | 1.73 $\pm$ 0.35 <sup>d</sup> <sub>C</sub>     | 1.27 $\pm$ 0.06 <sup>a</sup> <sub>B</sub>   | 2.84 $\pm$ 0.19 <sup>a</sup> <sub>BC</sub>  | 26.71 $\pm$ 5.14 <sup>c</sup> <sub>BC</sub>    | 26.99 $\pm$ 1.84 <sub>bc,B</sub>           | 3.4 $\pm$ 0.55 <sup>d,E</sup>                | 66.68 $\pm$ 0.1 <sub>1<sup>ab</sup>,AB</sub> | 108 $\pm$ 17.17 <sup>ab</sup> <sub>BCD</sub> | 6.07 $\pm$ 1.33 <sup>b,C</sup>                  | 65.25 $\pm$ 12.42 <sup>a,A</sup>               | 21.43 $\pm$ 4.55 <sup>a</sup> <sub>A</sub>   | 5.71 $\pm$ 0.96 <sup>c,BC</sup>               | 37.46 $\pm$ 2.45 <sup>b,AB</sup>               | 43.19 $\pm$ 6.71 <sup>a,A</sup>                 | 54.78 $\pm$ 3.91 <sub>b,ABC</sub>            |
| FO CD               | 6        | 27.41 $\pm$ 1.11 <sub>a,A</sub>             | 46.53 $\pm$ 3.23 <sup>b</sup> <sub>BCD</sub> | 31.9 $\pm$ 1.61 <sup>a</sup> <sub>A</sub>     | 39.08 $\pm$ 2.8 <sub>9<sup>a</sup>,A</sub>  | 43.7 $\pm$ 2.13 <sub>a,A</sub>              | 37.98 $\pm$ 0.92 <sub>b,D</sub>                | 39.72 $\pm$ 1.99 <sub>a,A</sub>            | 16.69 $\pm$ 0.38 <sub>a,BC</sub>             | 40.33 $\pm$ 2.8 <sub>1<sup>b</sup>,DE</sub>  | 14.04 $\pm$ 0.93 <sup>c</sup> <sub>B</sub>   | 23.95 $\pm$ 0.29 <sup>b</sup> <sub>a,ABCD</sub> | 49.21 $\pm$ 4.12 <sup>ab,ABC</sup>             | 18.94 $\pm$ 1.23 <sup>b</sup> <sub>BCD</sub> | 8.97 $\pm$ 0.21 <sup>a,DEF</sup>              | 55.72 $\pm$ 3.59 <sup>a,BCD</sup>              | 40.24 $\pm$ 4.14 <sup>ab,AB</sup> <sub>C</sub>  | 57.01 $\pm$ 5.83 <sub>b,BC</sub>             |
|                     | 12       | 25.99 $\pm$ 7.08 <sub>a,A</sub>             | 84.64 $\pm$ 26.0 <sub>7<sup>a</sup>,A</sub>  | 14.32 $\pm$ 4.04 <sub>b,A</sub>               | 33.84 $\pm$ 7.5 <sub>8<sup>a</sup>,A</sub>  | 46.06 $\pm$ 6.3 <sub>8<sup>a</sup>,A</sub>  | 40.2 $\pm$ 6.36 <sup>ab</sup> <sub>a,ABC</sub> | 38.26 $\pm$ 8.38 <sub>a,A</sub>            | 17.19 $\pm$ 2.92 <sub>a,A</sub>              | 77.35 $\pm$ 19.88 <sup>a,AB</sup>            | 28.21 $\pm$ 1.53 <sup>b</sup> <sub>B</sub>   | 28.63 $\pm$ 1.77 <sup>a</sup> <sub>A</sub>      | 54.54 $\pm$ 8.78 <sup>a,AB</sup>               | 13.87 $\pm$ 2.22 <sup>c</sup> <sub>BC</sub>  | 5.1 $\pm$ 1.34 <sup>b,CD</sup>                | 48.48 $\pm$ 7.67 <sup>ab,AB</sup> <sub>C</sub> | 41.44 $\pm$ 8.37 <sup>ab,A</sup>                | 64.33 $\pm$ 10.4 <sub>1<sup>ab</sup>,A</sub> |
|                     | 24       | 3.78 $\pm$ 0.23 <sup>b</sup> <sub>B</sub>   | 83.83 $\pm$ 3.16 <sup>a</sup> <sub>A</sub>   | 7.87 $\pm$ 0.83 <sup>c,B</sup>                | 0.55 $\pm$ 0.04 <sub>b,B</sub>              | 4.49 $\pm$ 0.69 <sub>b,B</sub>              | 50.16 $\pm$ 2.28 <sub>a,ABC</sub>              | 4.7 $\pm$ 0.33 <sup>b,CD</sup>             | 11.96 $\pm$ 1.27 <sub>b,BC</sub>             | 82.59 $\pm$ 11.79 <sup>a,A</sup>             | 49.11 $\pm$ 3.86 <sup>a</sup> <sub>CD</sub>  | 30.41 $\pm$ 0.89 <sup>a</sup> <sub>B</sub>      | 60.81 $\pm$ 2.27 <sup>a,A</sup>                | 24.02 $\pm$ 0.43 <sup>a</sup> <sub>A</sub>   | 6.83 $\pm$ 1.25 <sup>ab,AB</sup> <sub>C</sub> | 47.47 $\pm$ 1.39 <sup>ab,A</sup>               | 53.93 $\pm$ 0.91 <sup>a,A</sup>                 | 77.19 $\pm$ 2.58 <sub>ab,A</sub>             |
|                     | 48       | 3.09 $\pm$ 0.13 <sup>b</sup> <sub>B</sub>   | 84.36 $\pm$ 8.34 <sup>a</sup> <sub>A</sub>   | 1.72 $\pm$ 0.34 <sup>d</sup> <sub>C</sub>     | 0.32 $\pm$ 0.13 <sub>b,B</sub>              | 3.45 $\pm$ 0.23 <sub>b,B</sub>              | 49.47 $\pm$ 5.65 <sub>ab,A</sub>               | 2.91 $\pm$ 0.16 <sup>b</sup> <sub>C</sub>  | 10.7 $\pm$ 1.47 <sup>b</sup> <sub>BCD</sub>  | 66.08 $\pm$ 0.0 <sub>8<sup>ab</sup>,AB</sub> | 26.57 $\pm$ 0.39 <sup>b</sup> <sub>D</sub>   | 21.83 $\pm$ 1.37 <sup>b</sup> <sub>C</sub>      | 59.65 $\pm$ 1.12 <sup>a,A</sup>                | 15.5 $\pm$ 0.4 <sup>c,BC</sup>               | 4.85 $\pm$ 0.62 <sup>b,BCD</sup>              | 42.11 $\pm$ 2.66 <sup>b,A</sup>                | 45.08 $\pm$ 2.91 <sup>ab,A</sup>                | 63.45 $\pm$ 2.68 <sub>ab,A</sub>             |
| Fish oil WD         | 6        | 3.56 $\pm$ 0.15 <sup>a</sup> <sub>C</sub>   | 57.55 $\pm$ 2.24 <sup>a</sup> <sub>AB</sub>  | 9.68 $\pm$ 2.47 <sup>a</sup> <sub>C</sub>     | 0.13 $\pm$ 0.00 <sup>c</sup> <sub>D</sub>   | 1.88 $\pm$ 0.18 <sup>a</sup> <sub>C</sub>   | 53.38 $\pm$ 11.3 <sub>4<sup>ab</sup>,BC</sub>  | 3.23 $\pm$ 0.33 <sup>a</sup> <sub>C</sub>  | 21.57 $\pm$ 1.73 <sub>a,B</sub>              | 52.14 $\pm$ 1.4 <sub>7<sup>b</sup>,ABC</sub> | 22.88 $\pm$ 2.69 <sup>b</sup> <sub>B</sub>   | 21.55 $\pm$ 2.71 <sup>a</sup> <sub>ABCD</sub>   | 63.08 $\pm$ 1.35 <sup>a,A</sup>                | 24.45 $\pm$ 1.63 <sup>a</sup> <sub>A</sub>   | 12.21 $\pm$ 1.36 <sup>a,BC</sup>              | 72.76 $\pm$ 3.71 <sup>a,A</sup>                | 48.93 $\pm$ 2.03 <sup>a,A</sup>                 | 71.22 $\pm$ 1.99 <sub>a,A</sub>              |

|                             |    |                                       |                                        |                                        |                                      |                                       |                                       |                                       |                                       |                                        |                                         |                                         |                                      |                                        |                                         |                            |                                         |                                        |
|-----------------------------|----|---------------------------------------|----------------------------------------|----------------------------------------|--------------------------------------|---------------------------------------|---------------------------------------|---------------------------------------|---------------------------------------|----------------------------------------|-----------------------------------------|-----------------------------------------|--------------------------------------|----------------------------------------|-----------------------------------------|----------------------------|-----------------------------------------|----------------------------------------|
|                             | 12 | 3.17±0.02 <sup>a</sup> <sub>B</sub>   | 83.17±13.3 <sup>a</sup> <sub>7</sub>   | 5.12±0.41 <sup>b</sup> <sub>BCED</sub> | 0.73±0.07 <sub>b,C</sub>             | 1.01±0.14 <sub>b,D</sub>              | 47.92±6.93 <sub>ab,A</sub>            | 2.85±0.48 <sup>a</sup> <sub>B</sub>   | 15.68±1.75 <sub>b,AB</sub>            | 59.85±8.9 <sub>2<sup>a</sup>,BC</sub>  | 17.14±1.38 <sup>b</sup> <sub>B</sub>    | 11.86±0.82 <sup>b</sup> <sub>BC</sub>   | 53.23±4.88 <sup>a,AB</sup>           | 16.28±1.27 <sup>b</sup> <sub>ABC</sub> | 6.16±0.74 <sup>b,BC</sup>               | 51.49±1.14 <sup>b,AB</sup> | 37.61±2.14 <sup>a,AB</sup>              | 62.31±1.15 <sub>b,A</sub>              |
|                             | 24 | 3.08±0.42 <sup>a</sup> <sub>b,B</sub> | 75.94±2.00 <sup>a</sup> <sub>A</sub>   | 3.97±0.4 <sup>b,CD</sup>               | 0.14±0.03 <sup>c</sup> <sub>B</sub>  | 1.36±0.07 <sub>b,CD</sub>             | 57.26±1.97 <sub>a,A</sub>             | 2.54±0.45 <sup>a,E</sup>              | 18.45±0.82 <sub>ab,A</sub>            | 79.99±1.7 <sub>3<sup>a</sup>,A</sub>   | 72.74±12.25 <sub>ab,BC</sub>            | 9.82±0.99 <sup>b,C</sup>                | 48.31±0.14 <sup>a,AB</sup>           | 16.43±0.44 <sup>b</sup> <sub>D</sub>   | 4.71±0.2 <sup>b,CD</sup>                | 33.51±1.67 <sup>c,BC</sup> | 41.86±1.03 <sup>a,BC</sup>              | 57.94±1.47 <sub>b,BC</sub>             |
|                             | 48 | 1.93±0.78 <sup>b</sup> <sub>B</sub>   | 87.93±21.0 <sub>9<sup>a</sup>,A</sub>  | 5.62±0.52 <sup>b</sup> <sub>B</sub>    | 1.14±0.16 <sup>a</sup> <sub>B</sub>  | 1.07±0.27 <sub>b,BC</sub>             | 33.98±6.62 <sub>b,ABC</sub>           | 3.59±1.21 <sup>a</sup> <sub>C</sub>   | 15.71±2.2 <sup>b</sup> <sub>A</sub>   | 74.3±4.15 <sub>b,A</sub>               | 130.73±64.2 <sub>3<sup>a</sup>,BC</sub> | 4.77±1.23 <sup>c,C</sup>                | 60.48±14.35 <sup>a,A</sup>           | 12.41±1.68 <sup>c</sup> <sub>CD</sub>  | 2.03±0.46 <sup>c,F</sup>                | 36.02±2.01 <sup>c,AB</sup> | 45.37±8.9 <sup>a,A</sup>                | 52.15±1.92 <sub>c,BCD</sub>            |
| Pomegranate oil CD          | 6  | 29.38±1.46 <sub>a,A</sub>             | 37.27±4.87 <sup>b</sup> <sub>D</sub>   | 33.12±11.5 <sub>4<sup>a</sup>,A</sub>  | 32.08±4.4 <sub>8<sup>a</sup>,B</sub> | 36.12±4.9 <sub>3<sup>a</sup>,B</sub>  | 34.46±4.11 <sub>b,D</sub>             | 34.08±6.05 <sub>a,AB</sub>            | 16.59±2.7 <sup>a</sup> <sub>BC</sub>  | 33.26±2.3 <sub>b,E</sub>               | 12.14±2.21 <sup>c</sup> <sub>B</sub>    | 21.3±2.79 <sup>a,A</sup> <sub>BCD</sub> | 39.35±6.44 <sup>b,C</sup>            | 18.12±2.9 <sup>a,B</sup> <sub>CD</sub> | 8.09±1.91 <sup>a,EF</sup>               | 49.29±7.36 <sup>a,D</sup>  | 29.77±5.14 <sup>a,C</sup>               | 51.45±0.16 <sub>a,C</sub>              |
|                             | 12 | 24.99±1.28 <sub>b,A</sub>             | 70.02±5.73 <sup>a</sup> <sub>A</sub>   | 11.14±2.47 <sub>b,A</sub>              | 1.4±0.02 <sup>b,C</sup>              | 19.92±4.0 <sub>8<sup>b</sup>,C</sub>  | 34.49±4.76 <sub>b,ABC</sub>           | 26.17±11.6 <sub>9<sup>a</sup>,A</sub> | 9.28±0.79 <sup>c</sup> <sub>C</sub>   | 65.17±5.4 <sub>7<sup>a</sup>,BC</sub>  | 33.09±7.37 <sup>b</sup> <sub>B</sub>    | 20.57±4.09 <sup>a</sup> <sub>AB</sub>   | 50.89±7.9 <sup>a,AB</sup>            | 16.24±3.3 <sup>a,A</sup> <sub>BC</sub> | 3.98±0.53 <sup>b,D</sup>                | 40.51±6.27 <sup>a,BC</sup> | 40.78±8.41 <sup>a,AB</sup>              | 58.86±8 <sup>a,AB</sup>                |
|                             | 24 | 2.91±0.12 <sup>c</sup> <sub>B</sub>   | 76.02±5.06 <sup>a</sup> <sub>A</sub>   | 4.38±0.29 <sup>b</sup> <sub>CD</sub>   | 0.26±0.01 <sub>b,B</sub>             | 3.3±0.79 <sup>c,B</sup> <sub>C</sub>  | 54.73±2.7 <sup>a</sup> <sub>AB</sub>  | 3.43±0.23 <sup>b</sup> <sub>DE</sub>  | 11.79±1.36 <sub>ab,AB</sub>           | 67.87±4.2 <sub>2<sup>a</sup>,AB</sub>  | 22.83±3.25 <sup>b</sup> <sub>c,E</sub>  | 3.51±0.35 <sup>b,C</sup>                | 45.83±4.04 <sup>ab,B</sup>           | 21.13±1.6 <sup>a,A</sup> <sub>B</sub>  | 4.56±0.42 <sup>b,CD</sup>               | 42.46±4.78 <sup>a,A</sup>  | 39.57±2.17 <sup>a,CD</sup>              | 61.9±3.72 <sup>a</sup> <sub>B</sub>    |
|                             | 48 | 2.61±0.3 <sup>c,B</sup>               | 79.31±14.7 <sub>3<sup>a</sup>,A</sub>  | 1.79±0.14 <sup>b</sup> <sub>B</sub>    | 0.29±0.07 <sub>B</sub>               | 3.38±0.13 <sup>c</sup> <sub>B</sub>   | 44.86±4.6 <sup>ab</sup> <sub>AB</sub> | 2.78±0.42 <sup>b</sup> <sub>C</sub>   | 13.77±0.92 <sub>ab,AB</sub>           | 66.85±6.8 <sub>3<sup>a</sup>,AB</sub>  | 51.49±7.87 <sup>a</sup> <sub>BCD</sub>  | 18±1.86 <sup>c,A</sup>                  | 56.55±3.1 <sub>A</sub>               | 15.2±0.39 <sup>a,B</sup> <sub>C</sub>  | 2.37±0.56 <sup>b,EF</sup>               | 39.75±2.48 <sup>a,AB</sup> | 42.52±0.48 <sup>a,A</sup>               | 60.99±2.23 <sub>a,AB</sub>             |
| Pomegranate oil WD          | 6  | 3.46±0.38 <sup>a</sup> <sub>C</sub>   | 57.54±6.85 <sup>b</sup> <sub>AB</sub>  | 10.3±0.76 <sup>a</sup> <sub>C</sub>    | 0.62±0.08 <sub>b,D</sub>             | 1.65±0.11 <sup>a</sup> <sub>C</sub>   | 61.89±6.11 <sub>a,AB</sub>            | 1±0.15 <sup>b,C</sup>                 | 20.78±1.18 <sub>a,B</sub>             | 52.45±3.2 <sub>6<sup>b</sup>,ABC</sub> | 24.47±1.44 <sup>b</sup> <sub>B</sub>    | 20.47±1.67 <sup>a</sup> <sub>ABCD</sub> | 59.37±5.03 <sup>a,AB</sup>           | 22.5±1.47 <sup>a,A</sup> <sub>B</sub>  | 14.13±0.47 <sup>a,AB</sup>              | 65.6±6.88 <sup>a,ABC</sup> | 46.33±3.4 <sup>a,AB</sup>               | 68.56±5.56 <sub>a,AB</sub>             |
|                             | 12 | 2.2±0.04 <sup>b,B</sup>               | 62.71±3.8 <sup>ab</sup> <sub>A</sub>   | 2.58±0.52 <sup>c,E</sup>               | 0.2±0.01 <sup>c,C</sup>              | 1.5±0.01 <sup>b</sup> <sub>D</sub>    | 47.72±0.48 <sub>b,A</sub>             | 1.58±0.27 <sup>b</sup> <sub>B</sub>   | 14.49±0.54 <sub>b,AB</sub>            | 65.96±6.19 <sub>b,BC</sub>             | 22.58±1.51 <sup>b</sup> <sub>B</sub>    | 13.09±2.2 <sup>b,B</sup> <sub>C</sub>   | 48.56±0.64 <sup>a,BC</sup>           | 14.89±0.39 <sup>b</sup> <sub>BC</sub>  | 3.57±0.25 <sup>b,D</sup>                | 38.89±6.89 <sup>b,BC</sup> | 33.58±0.96 <sup>a,AB</sup>              | 53.38±2.25 <sub>ab,B</sub>             |
|                             | 24 | 3.32±0.71 <sup>a</sup> <sub>b,B</sub> | 76.03±6.29 <sup>a</sup> <sub>b,A</sub> | 3.59±0.92 <sup>b,c</sup> <sub>cd</sub> | 0.19±0.03 <sup>c</sup> <sub>B</sub>  | 1.38±0.21 <sup>a</sup> <sub>CD</sub>  | 58.53±2.37 <sub>a,A</sub>             | 3.1±0.02 <sup>a,DE</sup>              | 19.11±0.57 <sub>a,A</sub>             | 83.47±5.1 <sub>a,A</sub>               | 32.72±3.94 <sup>b</sup> <sub>DE</sub>   | 9.09±0.34 <sup>c,C</sup>                | 49.52±2.43 <sup>a,AB</sup>           | 16.12±0.38 <sup>b</sup> <sub>D</sub>   | 3.95±0.32 <sup>b,D</sup>                | 28.33±0.31 <sup>b,C</sup>  | 44.38±1.06 <sup>a,BC</sup>              | 60.02±0.59 <sub>ab,B</sub>             |
|                             | 48 | 2.5±0.29 <sup>ab</sup> <sub>B</sub>   | 82.01±11.0 <sub>9<sup>a</sup>,A</sub>  | 5.32±0.82 <sup>b</sup> <sub>B</sub>    | 1.19±0.09 <sup>a</sup> <sub>B</sub>  | 1.61±0.35 <sup>a</sup> <sub>BC</sub>  | 20.74±1.26 <sup>c</sup> <sub>C</sub>  | 2.88±0.77 <sup>a</sup> <sub>C</sub>   | 11.4±1.03 <sup>c</sup> <sub>ABC</sub> | 61.41±6.4 <sub>8<sup>b</sup>,B</sub>   | 135.17±67.3 <sub>4<sup>a</sup>,AB</sub> | 4.14±0.88 <sup>d,C</sup>                | 56.73±9.75 <sup>a,A</sup>            | 19.62±2.76 <sup>a</sup> <sub>AB</sub>  | 2.91±0.58 <sup>b,DEF</sup>              | 33.33±3.51 <sup>b,AB</sup> | 43.62±9.19 <sup>a,AB</sup>              | 44.09±5.62 <sub>c,D</sub>              |
| Fish oil+Pomegranate oil CD | 6  | 17.79±2.03 <sub>a,B</sub>             | 69.42±6.64 <sup>b</sup> <sub>A</sub>   | 12.71±0.51 <sub>a,BC</sub>             | 25.78±2.9 <sub>1<sup>a</sup>,C</sub> | 34.94±4.2 <sub>7<sup>a</sup>,B</sub>  | 43.71±4.98 <sub>a,CD</sub>            | 30.58±2.16 <sub>g,B</sub>             | 11.8±3.34 <sup>ab</sup> <sub>C</sub>  | 59.58±8.9 <sub>3<sup>a</sup>,AB</sub>  | 18.65±4.80 <sup>b</sup> <sub>B</sub>    | 17.82±4.06 <sup>a</sup> <sub>BCDE</sub> | 41.27±5.71 <sup>b,C</sup>            | 14.41±1.9 <sup>b,D</sup>               | 6.39±1.09 <sup>ab,F</sup>               | 39.79±5.22 <sup>a,E</sup>  | 33.5±5.49 <sup>b,B</sup>                | 54.06±8.21 <sub>a,BC</sub>             |
|                             | 12 | 19.84±1.31 <sub>a,A</sub>             | 55.47±6.29 <sup>b</sup> <sub>A</sub>   | 10.56±2.02 <sub>g,AB</sub>             | 1.89±0.76 <sub>b,C</sub>             | 25.93±6.9 <sub>5<sup>a</sup>,BC</sub> | 27.19±5.1 <sup>b</sup> <sub>C</sub>   | 24.75±4.83 <sub>a,A</sub>             | 8.91±2.18 <sup>a</sup> <sub>b,C</sub> | 51.2±7.49 <sub>a,C</sub>               | 20.75±4.58 <sup>b</sup> <sub>B</sub>    | 18.28±1.92 <sup>a</sup> <sub>B</sub>    | 42.35±0.51 <sup>b,B</sup>            | 13.21±0.77 <sup>b</sup> <sub>BC</sub>  | 4.56±0.59 <sup>b,CD</sup>               | 40.04±5.28 <sup>a,BC</sup> | 31.92±0.68 <sup>b,AB</sup>              | 51.81±3.94 <sub>a,AB</sub>             |
|                             | 24 | 2.84±0.5 <sup>b,B</sup>               | 75.17±11.8 <sub>3<sup>ab</sup>,A</sub> | 2.9±0.23 <sup>b,D</sup>                | 0.37±0.04 <sub>b,B</sub>             | 4.32±0.44 <sub>b,B</sub>              | 44.14±6.95 <sub>a,BC</sub>            | 5.83±0.74 <sup>b</sup> <sub>C</sub>   | 8.95±0.45 <sup>a</sup> <sub>b,C</sub> | 56.33±14.78 <sup>a,B</sup>             | 44.17±4.15 <sup>a</sup> <sub>DE</sub>   | 3.73±0.03 <sup>b,C</sup>                | 45.29±5.03 <sup>b,B</sup>            | 22.4±1.49 <sup>a,A</sup> <sub>B</sub>  | 6.93±1.2 <sup>a,ABC</sup>               | 48.11±1.44 <sup>a,A</sup>  | 39.24±2.28 <sup>ab,C</sup> <sub>D</sub> | 62.53±3.17 <sub>a,B</sub>              |
|                             | 48 | 3.13±0.12 <sup>b</sup> <sub>B</sub>   | 94.39±6.58 <sup>a</sup> <sub>A</sub>   | 2.2±0.33 <sup>b,C</sup>                | 0.52±0.2 <sup>b</sup> <sub>B</sub>   | 2.78±0.36 <sub>b,BC</sub>             | 41.56±6.02 <sub>ab,ABC</sub>          | 2.05±0.7 <sup>b,C</sup>               | 6.03±0.53 <sup>b</sup> <sub>D</sub>   | 75.44±4.0 <sub>6<sup>a</sup>,A</sub>   | 44.64±5.65 <sup>a</sup> <sub>BCD</sub>  | 13.74±2.97 <sup>a</sup> <sub>C</sub>    | 61.09±1.13 <sup>a,A</sup>            | 16.47±1.82 <sup>b</sup> <sub>ABC</sub> | 4.25±0.35 <sup>a,ABC</sup>              | 42.5±4.08 <sup>a,A</sup>   | 46.81±2.37 <sup>a,A</sup>               | 61.6±3.93 <sup>a</sup> <sub>A</sub>    |
| Fish oil+Pomegranate oil WD | 6  | 3.42±0.14 <sup>a</sup> <sub>C</sub>   | 51.56±2.74 <sup>c</sup> <sub>BC</sub>  | 10.29±1.15 <sub>a,C</sub>              | 0.28±0.12 <sub>b,D</sub>             | 2.29±0.07 <sup>a</sup> <sub>C</sub>   | 45.18±1.58 <sub>a,CD</sub>            | 1.55±0.41 <sup>b</sup> <sub>C</sub>   | 19.04±1.76 <sub>a,BC</sub>            | 47.02±3.3 <sub>9<sup>c</sup>,CD</sub>  | 20.22±1.57 <sup>c</sup> <sub>B</sub>    | 22.55±0.31 <sup>b</sup> <sub>AB</sub>   | 59.3±3.7 <sub>6<sup>a</sup>,AB</sub> | 23.91±0.66 <sup>a</sup> <sub>A</sub>   | 11.34±0.64 <sup>b,CD</sup> <sub>E</sub> | 70.39±4.52 <sup>a,AB</sup> | 48.14±4.9 <sup>a,A</sup>                | 67.14±0.00 <sub>5<sup>a</sup>,AB</sub> |
|                             | 12 | 2.47±0.5 <sup>ab</sup> <sub>B</sub>   | 64.16±4.47 <sup>b</sup> <sub>A</sub>   | 3.38±0.33 <sup>b</sup> <sub>DE</sub>   | 0.23±0.01 <sub>b,C</sub>             | 1.51±0.11 <sub>b,D</sub>              | 41.44±2.34 <sub>a,AB</sub>            | 1.49±0.25 <sup>b</sup> <sub>B</sub>   | 12.27±0.74 <sub>a,BC</sub>            | 66.97±4.2 <sub>b,BC</sub>              | 22.64±2.22 <sup>c</sup> <sub>B</sub>    | 16.02±1.45 <sup>b</sup> <sub>BC</sub>   | 52±4.02 <sup>ab</sup> <sub>AB</sub>  | 15.82±0.3 <sup>b,A</sup> <sub>BC</sub> | 4.72±0.72 <sup>b,CD</sup>               | 34.94±1.03 <sup>b,C</sup>  | 34.42±1.69 <sup>b,AB</sup>              | 52.61±0.31 <sub>c,AB</sub>             |
|                             | 24 | 3.55±0.75 <sup>b</sup> <sub>B</sub>   | 82.92±6.23 <sup>a</sup> <sub>A</sub>   | 3.96±0.9 <sup>b,CD</sup>               | 0.55±0.02 <sup>b</sup> <sub>B</sub>  | 1.03±0.03 <sup>c</sup> <sub>D</sub>   | 51.02±8.92 <sub>a,ABC</sub>           | 2.61±0.19 <sup>a,E</sup>              | 12.68±1.69 <sub>b,BC</sub>            | 81.71±5.1 <sub>a,A</sub>               | 46.82±5.91 <sup>b</sup> <sub>DE</sub>   | 8.51±0.69 <sup>b,C</sup>                | 50.49±1.91 <sup>b,AB</sup>           | 16.13±1.3 <sup>b,D</sup>               | 5.74±0.64 <sup>b,BCD</sup>              | 28.26±1.04 <sup>c,C</sup>  | 45.21±0.3 <sup>b</sup> <sub>B</sub>     | 63.39±0.65 <sub>b,B</sub>              |
|                             | 48 | 2.05±0.08 <sup>b</sup> <sub>B</sub>   | 1.74±0.26 <sup>d,B</sup>               | 2.27±0.5 <sup>b,C</sup>                | 1.44±0.38 <sup>a</sup> <sub>B</sub>  | 0.81±0.17 <sup>c</sup> <sub>C</sub>   | 25.76±3.23 <sub>b,BC</sub>            | <0.05                                 | 8.78±0.23 <sup>c</sup> <sub>CD</sub>  | 13.68±0.3 <sub>3<sup>d</sup>,D</sub>   | 72.19±14.63 <sub>a,BCD</sub>            | 103.07±19.3 <sub>2<sup>a</sup>,A</sub>  | 4.61±0.9 <sub>8<sup>b</sup>,B</sub>  | 3.35±0.69 <sup>c,E</sup>               | <0.05                                   | 34.68±2.96 <sup>b,AB</sup> | 44.49±8.15 <sup>a,A</sup>               | 52.15±1.92 <sub>c,BCD</sub>            |
